# Supplementary material for: Fabrication, Characterization, and Cytotoxicity of Thermoplastic Polyurethane/Poly(lactic acid) Material Using Human Adipose Derived Mesenchymal Stromal Stem Cells (hASCs)
Source: MDPI journal article supplement (doi:10.3390/polym10101073), 2018-09-28
Supplement: s1 [file s1]

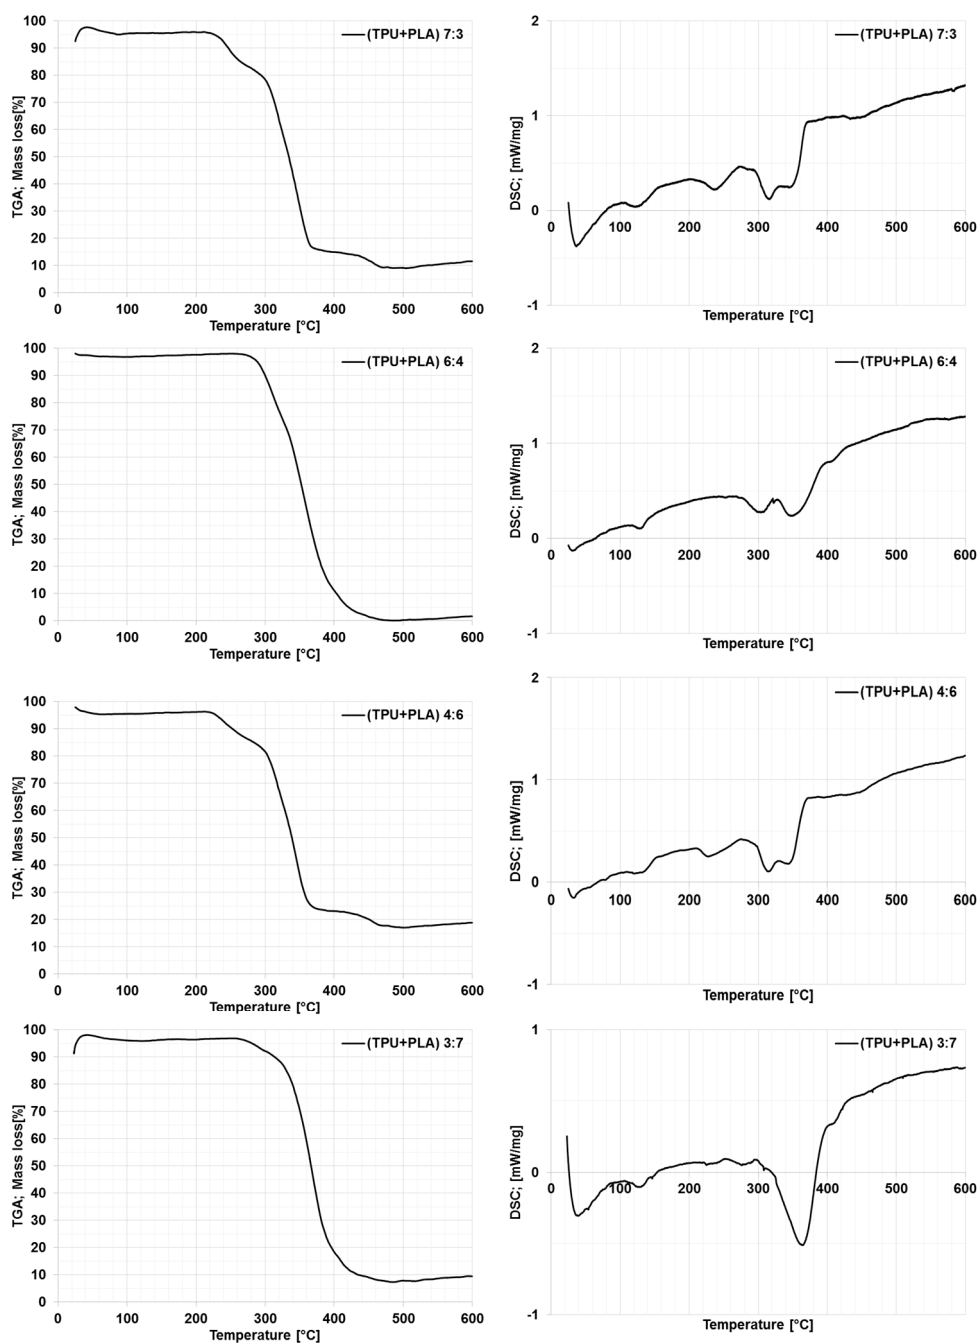

**Supplementary Figure S1.** TGA and DSC curves of different (TPU+PLA) blends: 7:3, 6:4, 4:6 and 3:7.
